# Supplementary material for: Solvothermal preparation of spherical Bi2O3 nanoparticles uniformly distributed on Ti3C2Tx for enhanced capacitive performance
Source: Royal Society of Chemistry journal article supplement (doi:10.1039/d1na00443c), 2021-01-01
Supplement: d1na00443c1.pdf [file d1na00443c1.pdf]

## Supporting Information

### **Solvothermal Preparation of Spherical Bi<sub>2</sub>O<sub>3</sub> Nanoparticles Uniformly Distributed on Ti<sub>3</sub>C<sub>2</sub>T<sub>x</sub> for Enhanced Capacitive Performance**

*Tao Li,<sup>a,b</sup> Xuefeng Chang,<sup>a,b</sup> Lifang Mei,<sup>a,b</sup> Xiayun Shu,<sup>\*a,b</sup> Jidong Ma,<sup>c</sup> Li Ouyang,<sup>a,b</sup>  
Siyong Gu,<sup>\*c</sup>*

<sup>a</sup> *Mechanical and Automotive Engineering, Xiamen University of Technology, Fujian,  
Xiamen, 361024. P. R. China.*

<sup>b</sup> *Institute of Precision Actuation and Transmission, Fujian, Xiamen, 361024. P. R. China.*

<sup>c</sup> *The Key Laboratory for Power Metallurgy Technology and Advanced Materials of Xiamen,  
Fujian, Xiamen, 361024. P. R. China.*

**\*Corresponding author** E-mail address: *shuxiayun@xmut.edu.cn (Xiayun Shu) gu-  
siyong@163.com (Siyong Gu),*

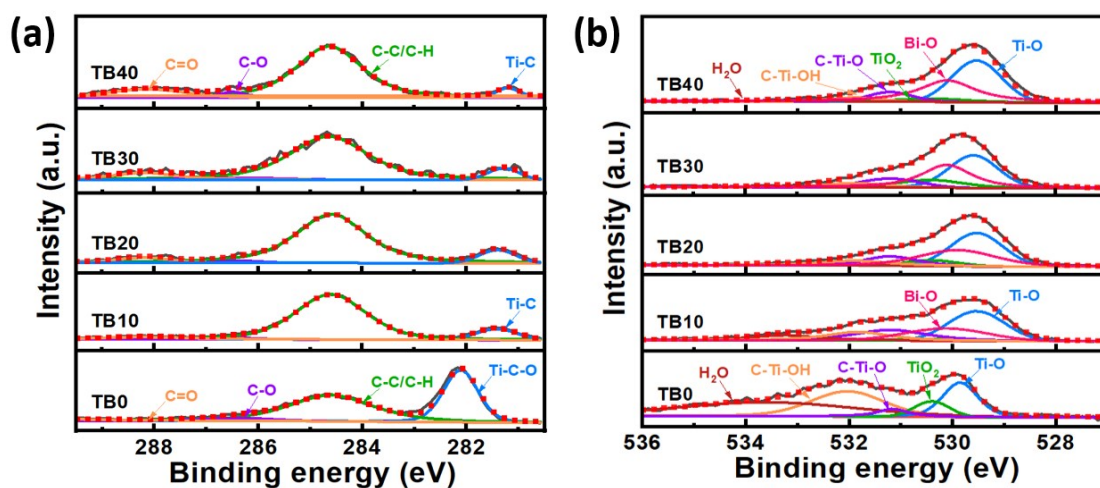

Fig. S1 (a) C 1s and (b) O 1s high-resolution spectra of TB0–TB40

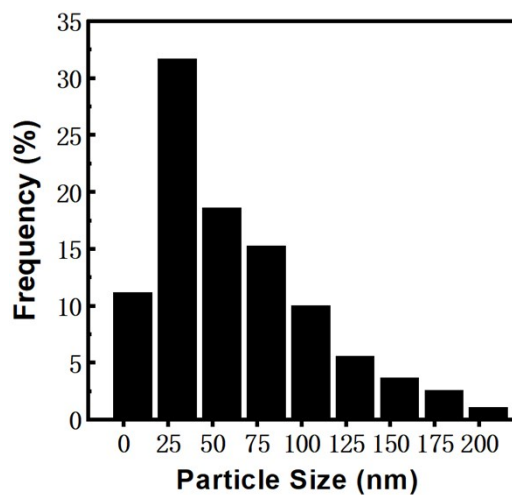

Fig. S2 Particle-size distribution of TB30

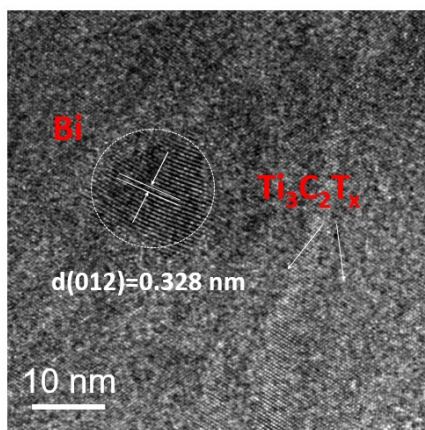

Fig. S3 HRTEM images of TB30.
